# Supplementary material for: Antibacterial Activity of Lactobacillus Strains Isolated from Mongolian Yogurt against Gardnerella vaginalis
Source: Hindawi journal article supplement (doi:10.1155/2020/3548618), 2020-01-01
Supplement: f1 [file 3548618.f1.pdf]

## Supplementary material

### Supplementary TABLE S1: Primer sequences used for PCR or RT-qPCR assay

| Target                          | PCR primers                                                                 | Annealing temp. (°C) | Amplicon size (bp) | Ref. |
|---------------------------------|-----------------------------------------------------------------------------|----------------------|--------------------|------|
| <i>plnA</i>                     | F: GTA CAG TAC TAA TGG GAG<br>R: CTT ACG CCA ATC TAT ACG                    | 53                   | 450                | 14   |
| <i>plnB</i>                     | F: TTC AGA GCA AGC CTA AAT GAC<br>R: GCC ACT GTA ACA CCA TGA C              | 51.5                 | 165                | 14   |
| <i>plnC</i>                     | F:AGC AGA TGA AAT TCG GCA G<br>R: ATA ATC CAA CGG TGC AAT CC                | 49.5                 | 108                | 14   |
| <i>plnD</i>                     | F: TGA GGA CAA ACA GAC TGG AC<br>R: GCA TCG GAA AAA TTG CGG ATA C           | 53                   | 414                | 14   |
| <i>plnEF</i>                    | F: GGC ATA GTT AAA ATT CCC CCC<br>R:CAG GTT GCC GCA AAA AAA G               | 53.2                 | 428                | 14   |
| <i>plnI</i>                     | F: CTC GAC GGT GAA ATT AGG TGT AAG<br>R: CGT TTA TCC TAT CCT CTA AGC ATT GG | 52.5                 | 450                | 14   |
| <i>plnJ</i>                     | F: TAA CGA CGG ATT GCT CTG<br>R: AAT CAA GGA ATT ATC ACA TTA GTC            | 51                   | 475                | 14   |
| <i>plnK</i>                     | F:CTG TAA GCA TTG CTA ACC AAT C<br>R: ACT GCT GAC GCT GAA AAG               | 52.9                 | 246                | 14   |
| <i>plnG</i>                     | F:TGC GGT TAT CAG TAT GTC AAA G<br>R: CCT CGA AAC AAT TTC CCC C             | 52.8                 | 453                | 14   |
| <i>plnN</i>                     | F:ATT GCC GGG TTA GGT ATC G<br>R: CCT AAA CCA TGC CAT GCA C                 | 51.9                 | 146                | 14   |
| Plantaricin NC8 structural gene | F: GGT CTG CGT ATA AGC ATC GC<br>R: AAA TTG AAC ATA TGG GTG CTT TAA ATT CC  | 60                   | 207                | 14   |
| Plantaricin S structural gene   | F: GCC TTA CCA GCG TAA TGC CC<br>R: CTG GTG ATG CAA TCG TTA GTT T           | 60                   | 320                | 14   |
| Plantaricin W structural gene   | F: TCA CAC GAA ATA TTC CA<br>R: GGC AAG CGT AAG AAA TAA ATG AG              | 55                   | 165                | 14   |
| <i>entA</i>                     | F:AAA TAT TAT GGA GTG TAT<br>R:GCA CTT CCC TGG AAT TGC TC                   | 56                   | 159                | 15   |
| <i>gasA</i>                     | F: GAA CAG GTG CAC TAA TCG GT<br>R: CAG CTA AGT TAG AAG GGG CT              | 62                   | 800                | 16   |
| <i>laf</i>                      | F:AGT CGT TGT TGG TGG AAG AAA T<br>R:TCT TAT CTT GCC AAA ACC ACC T          | 62                   | 184                | 17   |
| <i>HMPREF0424_1122</i>          | F: CAGCACCTGTAGCTCCAACA<br>R:TGGCTCAAGAGATTGTGTGC                           | 60                   | 195                | 19   |
| <i>HMPREF0424_0156</i>          | F: CCGACCGCATACTATTTTG<br>R: GCAAGACGGTCTCCAAACTC                           | 60                   | 178                | 19   |
| <i>HMPREF0424_0354</i>          | F: AACCAAGCAATTCCACAAGC<br>R: CCGTCGTTTTGGCAGTATTT                          | 60                   | 199                | 19   |
| <i>16S RNA</i>                  | F: TGAGTAATGCGTGACCAACC<br>R: AGCCTAGGTGGGCCATTACC                          | 60                   | 167                | 19   |

The primers of *plnA* to *laf* were used to detect the the plantaricin-related genes in the five newly isolated strains. The primers *HMPREF0424\_1122* to *16S RNA* were used to detect the virulence genes in *G. vaginalis*.

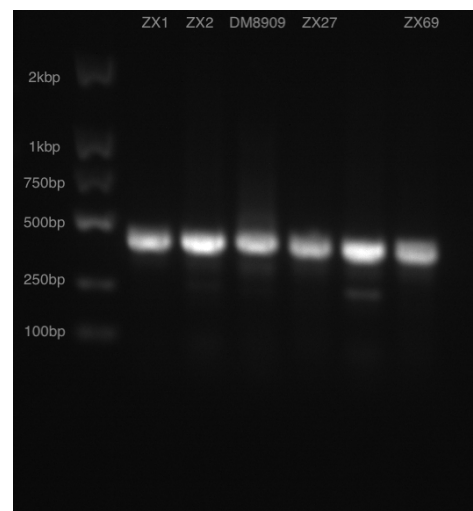

Supplementary FIGURE S1: The *plnA* gene detection results of 5 strains.

The sequencing results of the *plnA*(450bp) are the following:

nAsTnttdSsTCTTACGCCATCTATACGAAATATAACTTGAAAAACAGTTATT  
 CAATAAATCAATTACCATCCCCATTTTTTAAACAGTTTCTTTACCTGTTTAA  
 TTGCAGTTGCCCCCATCTGCAAAGAATACGCACTACTCTTTCCACCTACTA  
 TTTTTTGCATTTCTTATTACTAAGTTGCTTCATACCTTTAATTTGAATTTTC  
 ATAATAATCACCTCGCTTTTAGGATAATGTGTTTTTTGAAGTACGGAGGAAT  
 TATTTCTATTAACGTACATTTTTTAAATTTAAACGTGAATCACCATGAAAT  
 TCCAACATATGCTATCAATCAATATTTGATGAATGTCAAAGTCACTATTTTG  
 AATAGATCTTGATTACTTTGAACATACTTAGAGGATAAAATAACATTAACT  
 TAAGTGTAGCGCTAAAGAATTCAAGATAAACTCCCATTAGTAACTGTACA  
 AAA

The similarity index of the five strains sequence to *plnA* sequence in NCBI was 98.8%.

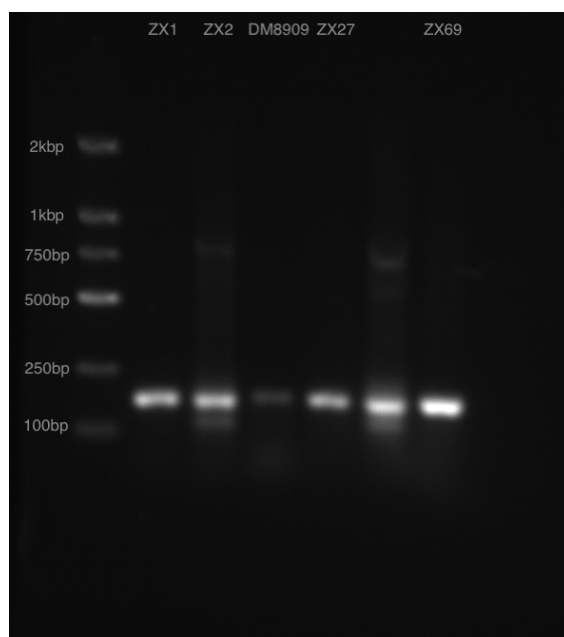

**Supplementary FIGURE S2:** The *plnB* gene detection results of 5 strains.

The sequencing results of the *plnB*(165bp) are the following:

nBsTnttdSsGATATCTGCCACTGTAACACCATGACTGAGAATAAAGTCAGTG  
 TTAGCTATTTCAATCGTCAACTTAACCCCGCACTGTTTCGCATAAAAAAAC  
 TTCTGTACAATAACCCGCGCAATATCTCATTCTTCAGATGctGAACACTT  
 GCAAAGCTACCGTCATTTAGGCTAGCTCTGAAAACAA

The similarity index of the five strains sequence to *plnB* sequence in NCBI was 91.0%.

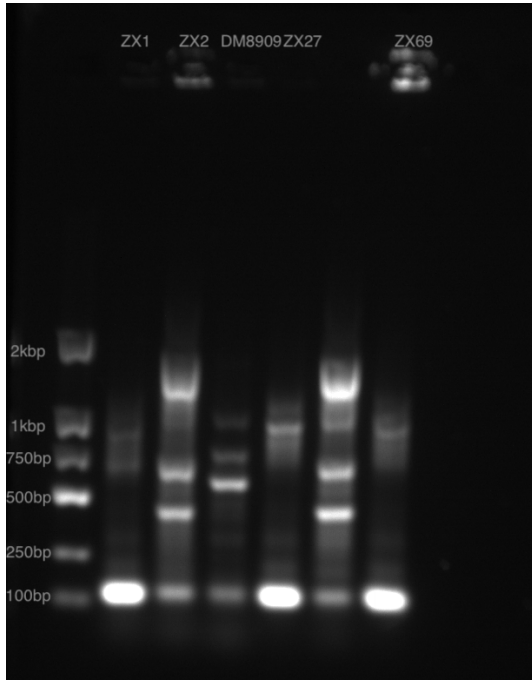

**Supplementary FIGURE S3:** The *plnC* gene detection results of 5 strains.

The sequencing results of the *plnC*(108bp) are the following:

TATCGATAATCCAACGGTGCAATCCGCCGCTCCAGTGTCAAAAAAGATAA  
 CTCTTCATGAGTTGTAATAAATAACAATTTGTGCACAAGGTAAGTCTGCCG  
 AATTCATCTGCTCGA

The similarity index of the five strains sequence to *plnC* sequence in NCBI was 96.5%.

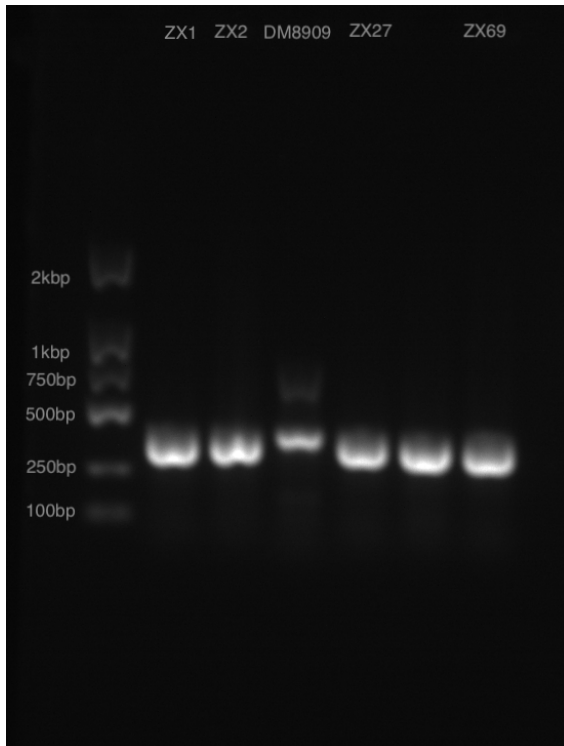

**Supplementary FIGURE S4:** The *plnD* gene detection results of 5 strains.

The sequencing results of the *plnD*(414bp) are the following:

```
TGCATCGGAAAAAATTGCGGATACTTTTCTTCGAGCGCATTAAATTCCT
GGGAACTCAGCAACCTTATTAATAGCATGGAGTTGTACGCTGCCC GGACG
CAGTTTAGATGTACTCAACAAAATCACATCATCTAATGCGAGTGAAAAGT
ATCGCGTTCCTAACTTATAGTTAAAAACATCTTTGCGCTGACTATTAGTCT
TTTTTAATTCGTTCTGTACTACATTGATGTCCTTAATAATCCTTTGCGTAAT
TAGGTCAGCAGACTGGTCTTTCAAATATAATCCAACGGTGCAATCCGCC
GTTCCAGAGTTACAAACGATAGCTCATCGTGTGTTGTAATGAAA ACTATTT
TAGCCAATGGTATCGTtGCCCGAaTtCgACTGGCTAATTCAAGTCCAGTCTG
TTTTGTCCTCAA
```

The similarity index of the five strains sequence to *plnD* sequence in NCBI was 98.1%.

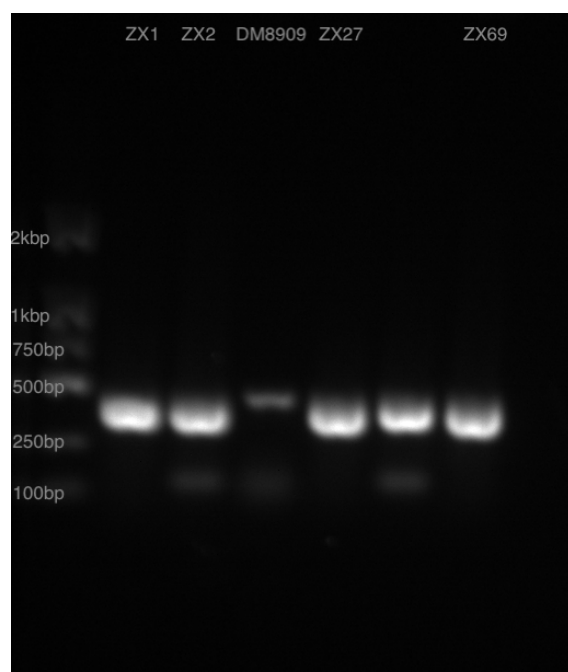

**Supplementary FIGURE S5:** The *plnEF* gene detection results of 5 strains.

The sequencing results of the *plnEF*(428bp) are the following:

```
TCAGGTTGCCCGCAAAAAAAGCTTGCCAAAATATCTGGTGGTTTTAATCG
GGGCGGTTATAACTTTGGTAAAAGTGTTTCGACATGTTGTTGATGCAATTGG
TTCAGTTGCAGGCATTCGTGGTATTTTGAAAAGTATTCGTTAATTTTCTTG
GGGAGATCAACAATTATGAAAAAATTTCTAGTTTTGCGTGACCGTGAAT
TAAATGCTATTTTCAGGTGGCGTTTTCCATGCCTATAGCGCGCGTGCCGTTT
GGAATAATTATAAAAAGTGCTGTTGGGCCTGCCGACTGGGTCATTAGCGCT
GTCCGAGGATTCATCCACGGATAGTTCAAGCCATCAAGTTTAAGCACTAT
AAGAAAGCACTCGATTTATGACTGGGCCTGCAGTGCTCAGCεTTTTTAGTT
TATATGGGGGAATTTAAA ACTATGCC
```

The similarity index of the five strains sequence to *plnEF* sequence in NCBI was 99.4%.

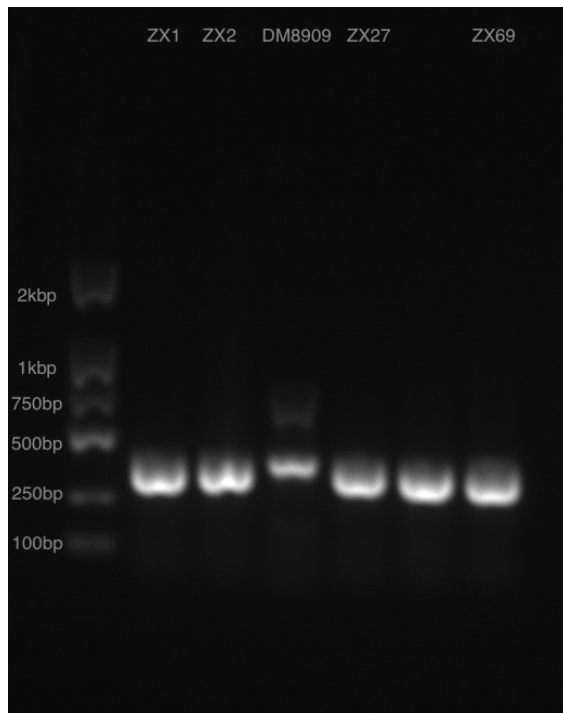

**Supplementary FIGURE S6:** The *plnI* gene detection results of 5 strains.

The sequencing results of the *plnI*(450bp) are the following:

```
GCTTCGTTTATCCTTCCTCTAAGCATTGGAAGTTaTTGAGTaTCcTAAaTATT
GaAGATAAAATAGACGAGTAATCATCCATTCTGAATTCCTATAAATTATTG
TTTGCAGCACTACAATTTCAATTATCTCTGAAGTTTTGGGTTACGCTAAGA
GCTAGTCATATCGCTAGCTAAATTTACGTCTTAACGCTATGCTAATATAC
TTTACGATCGAGTACTGTGCTTACTTTTTAGTCATTTTAATACTCATAAGAT
CACAATTAGAGCCCTACTCCAACCTATCTTCAGCGCCTATATTATATAATCA
GATTCATATTCATAACAAAAGAGCCCTGTCAAATAACACTGACAGAAGC
TCTAAATAATATTAATAAAACTAGTTGTCTCTCAACAACTtAttCAATtCCCG
CGACTTTCTAAACGAAGCCTTACACCTAATTTACCCGTCGAGA
```

The similarity index of the five strains sequence to *plnI* sequence in NCBI was 96.1%.

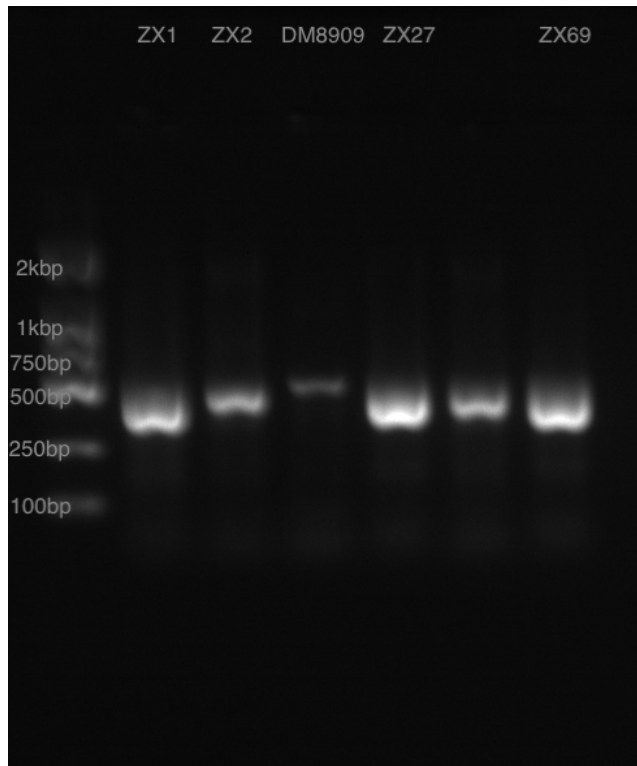

**Supplementary FIGURE S7:** The *plnJ* gene detection results of 5 strains.

The sequencing results of the *plnJ*(475bp) are the following:

```

TTAACGACGGGATGCTCTGCCAGCTTCGCCATCATAAAAATCCTTTTCTTAA
ACTAGACCAGAAATTTTTCCAAGCGCCTCCCCCAACAACCCCGTTCAACTT
ATTATTAGAAATAGGTGCAAATGCATCTACTACATCCAAATCCTTAATCAT
TTGTTCACAGTCATACCTCTCCCTTACTGTAGCAGTTAAAAATGGTTCT
ATGCGCTACGTATTTTAAATGCACTTATTAATATACGCTACAATTTAAAAA
AAATTATTTTAAATTTGTTATCGTACTATTTAATCGATTTAACGTAACCTTGA
AAGTTGAATGTCTGACGATCCCATAACATTAATGGGATTATTTTTGCTATG
ACGAATTGTTAAATTAAGTGCAATATTTTACCAAAGAAAACCTTCACTTGGC
CTTTTTCATTtCAAGCTCTTACGTGGCGATTATTTAAATCTATGACTAATGT
GATATTCCCTTGATTA

```

The similarity index of the five strains sequence to *plnJ* sequence in NCBI was 98.8%.

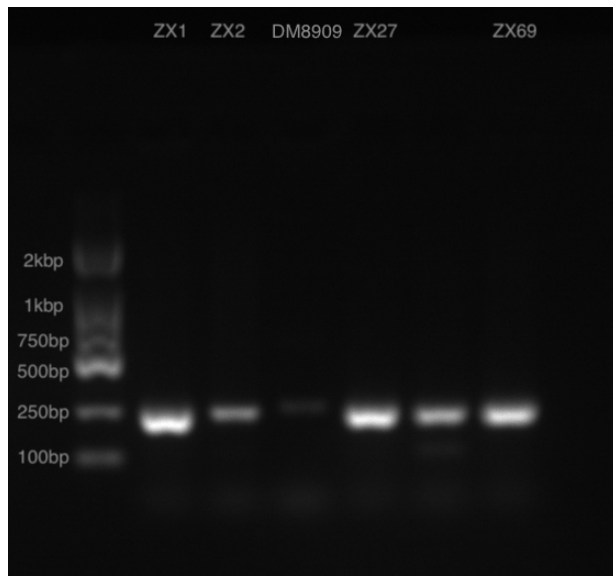

**Supplementary FIGURE S8:** The *plnK* gene detection results of 5 strains.

The sequencing results of the *plnK*(246bp) are the following:

```
TACTGCTGACGCTGAAAAGAATATTTCTGGTGGCCGTCGGAGTCGTAAAA
ATGGAATTGGATACGCTATTGGTTATGCGTTTGGCGCGGTTGAACGGGCC
GTGCTTGGTGGTTCAAGGGATTATAATAAGTGATAGAAATTGATTTCAA
GAAAAATATTACCCGCTAGTGTTAGTGCTCTTTGTGGCTGGTTATATGGGT
GCCATCTTTCTTAATATTTATTTTGATTGGTTAGCAATGCTTACAGA
```

The similarity index of the five strains sequence to *plnK* sequence in NCBI was 97.7%.

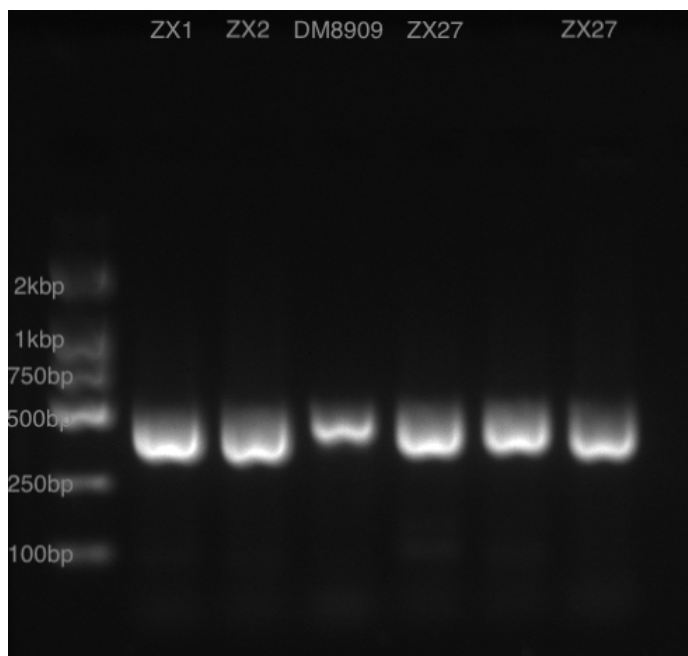

**Supplementary FIGURE S9:** The *plnG* gene detection results of 5 strains.

The sequencing results of the *plnG*(453bp) are the following:

```
CCTCGAAACCCATTCCCCCGTCCGCCGAGTGGCAAAAAAACTCATTGGCA
ATTCaAAGACGTGCCGAATATAGCCTAAAATAATTTCAATCGAAAGTCGTT
```

GACCTAAAACCGCCAATAAAAAATTCTGGGCATAAGTAAAGATAGCCTGA  
 AAGGTATAAAAAACGATTAGACCAATGGCCACCACTGCCAATGTACTGTG  
 CATATTATTGGGAATATAAGTATCAATCACCGCTTGTAAGAAATAAGACC  
 CACAGATACTAATAATCGTGATTA AAACTGCAGCAAGCACAATATTAATA  
 ACCAGTCGGCGCTGCTTTAATAAGCTTGAATAAATCCCCATAGTGAGCC  
 CTTATCTTGCTTAACTGGCTTATATTCCGACTTCGGTGCAAAGAAAAGGGC  
 AACTCCGGACCATTTCGCTTTCAAACCGTTCCTTTGACATACTGATTAACCG  
 CAA

The similarity index of the five strains sequence to *plnG* sequence in NCBI was 98.5%.

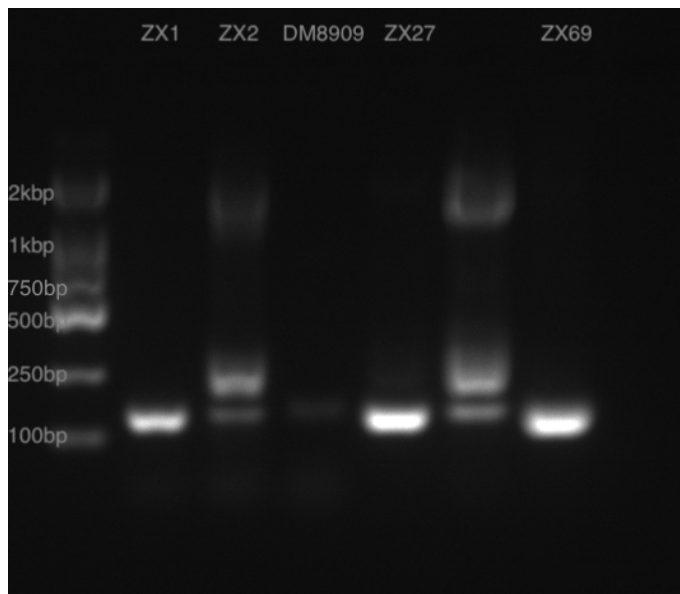

**Supplementary Figure S10:** The *plnN* gene detection results of 5 strains.

The sequencing results of the *plnN*(146bp) are the following:

TACCTAAACCATGCCATGCACTCGAAGTTCCTCTGCTaCcTTTCccAGCaAT  
 GTAAGGCTCTTGTACCACCATGTCTTAGAATAGTTTTCCACCtTCAACGGT  
 AGTCAAATCTTTTTCTGCCATTTTCGATACCTAACCCGGCAATAGA

The similarity index of the five strains sequence to *plnN* sequence in NCBI was 95.4%.



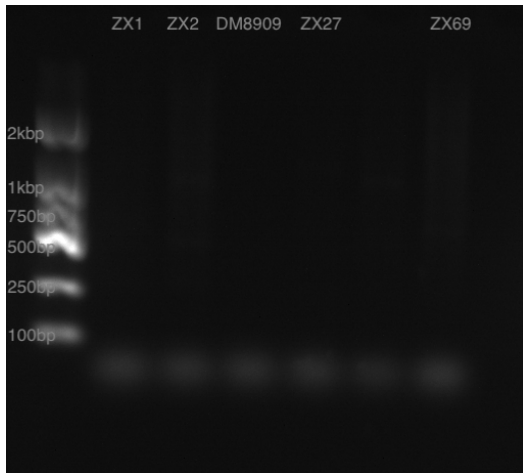

**Supplementary FIGURE S11:** The Plantaricin NC8 structural gene detection results of 5 strains.

The Plantaricin NC8 structural gene of 5 samples was negative.

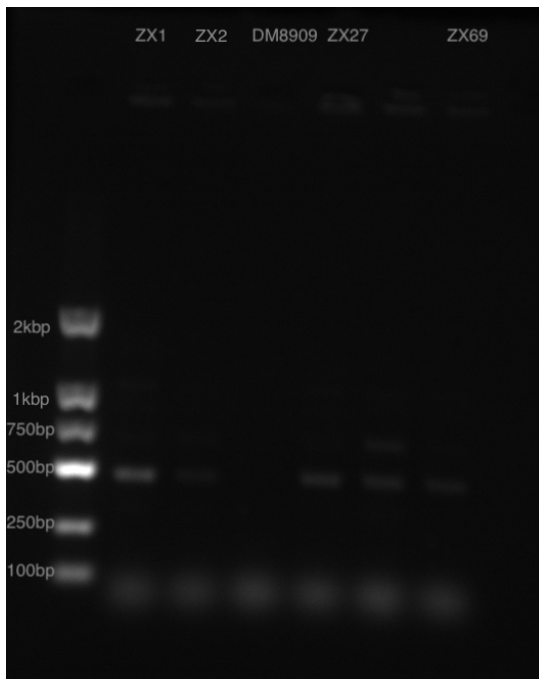

**Supplementary FIGURE S12:** Plantaricin S structural gene detection results of 5 strains.

The Plantaricin S structural gene of 5 samples was negative.

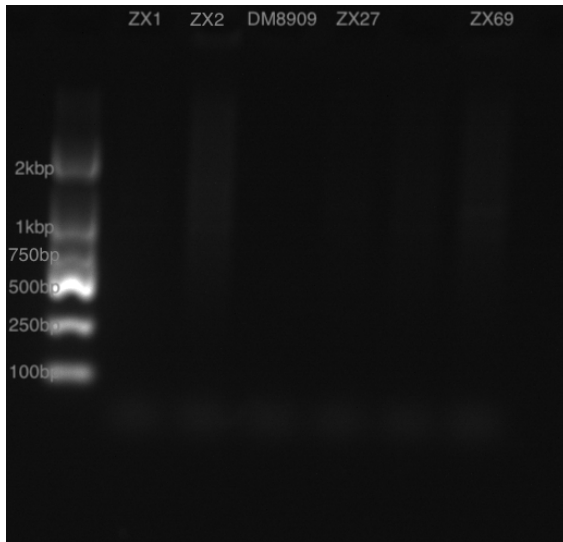

**Supplementary FIGURE S13:** The Plantaricin W structural gene detection results of 5 strains.

The Plantaricin W structural gene of 5 samples was negative.

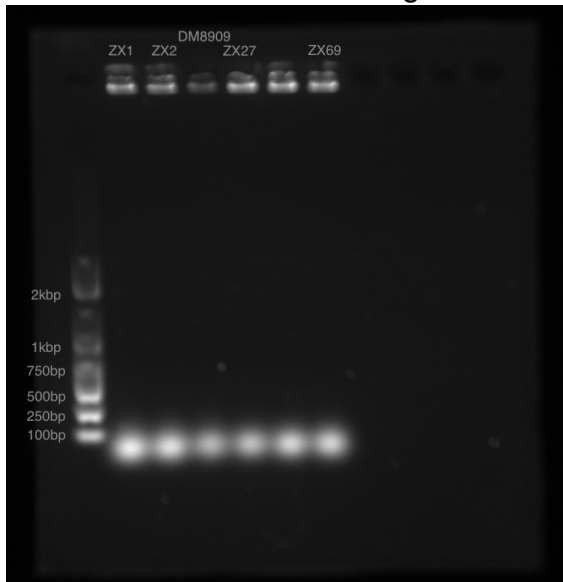

**Supplementary FIGURE S14:** The *entA* gene detection results of 5 strains.

The *entA* gene of 5 samples was negative.

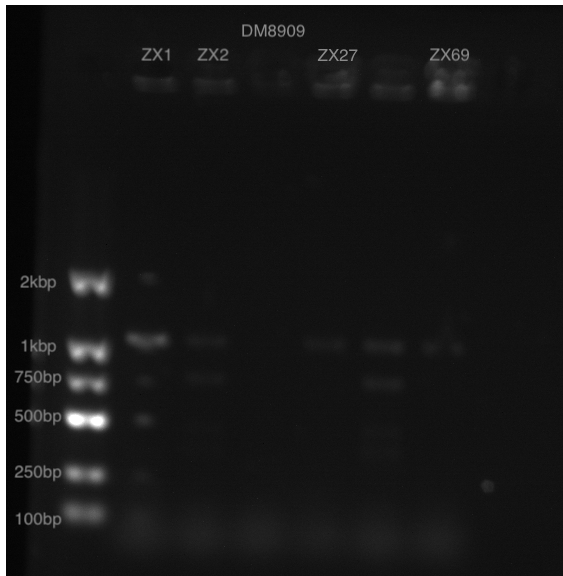

Supplementary **FIGURE S15**: The *gasA* gene detection results of 5 strains. The *gasA* gene of 5 samples was negative.

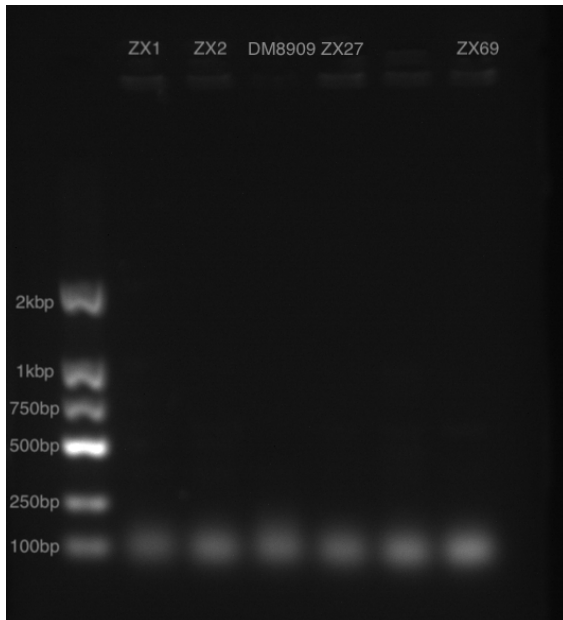

Supplementary **FIGURE S16**: The *laf* gene detection results of 5 strains. The *laf* gene of 5 samples was negative.
